# Supplementary material for: Characterization of a caspase-3-substrate kinome using an N- and C-terminally tagged protein kinase library produced by a cell-free system
Source: PubMed Central journal article supplement — Cell Death Dis. 2010 Oct 28;1(10):e89–. doi: 10.1038/cddis.2010.65 (PMC3035903; doi:10.1038/cddis.2010.65), 2010-10-28
Supplement: cddis201065x1.pdf [file cddis201065x1.pdf]

**Supplementary Table S1. Summaries of the characteristics of the PKs in the kinome and the results obtained in the study.**

| Symbol  | Kinome Name | Group    | Family    | Subfamily | Origin of clone | CloneTypes | Clone ID     | Ave. Luminescence signal <sub>-Buffer</sub> | Ave. Luminescence signal <sub>CAPS3 treatment</sub> | Luminescent signal (%) (Remaining signal after CASP3 treatment) | Immunoblotting in vitro | References |
|---------|-------------|----------|-----------|-----------|-----------------|------------|--------------|---------------------------------------------|-----------------------------------------------------|-----------------------------------------------------------------|-------------------------|------------|
| STK4    | MST1        | STE      | STE20     | MST       | Hs              | MGC        | 7939613      | 37163                                       | 256                                                 |                                                                 | Cleavage                | 1          |
| MKNK2   | MNK2        | CAMK     | MAPKAPK   | MNK       | Hs              | MGC        | 6527053      | 49895                                       | 363                                                 |                                                                 | Cleavage                | This study |
| MARK1   | MARK1       | CAMK     | CAMKL     | MARK      | Hs              | MGC        | 40036731     | 8695                                        | 281                                                 |                                                                 | Cleavage                | This study |
| BUB1B   | BUBR1       | Other    | BUB       |           | Hs              | MGC        | 4649881      | 7858                                        | 300                                                 |                                                                 | Cleavage                | 2          |
| PRKX    | PRKX        | AGC      | PKA       |           | Hs              | MGC        | 5485308      | 45320                                       | 2681                                                |                                                                 | Cleavage                | This study |
| PKN2    | PKN2        | AGC      | PKN       |           | Hs              | MGC        | 40123309     | 22515                                       | 1553                                                |                                                                 | Cleavage                | 3          |
| LIMK1   | LIMK1       | TKL      | LISK      | LIMK      | Hs              | EU         | NM_002314    | 12090                                       | 1125                                                |                                                                 | Cleavage                | 4          |
| Rock1   | ROCK1       | AGC      | DMPK      | ROCK      | Mm              | FANTOM     | F630326J04   | 18901                                       | 3285                                                |                                                                 | Cleavage                | 5          |
| PAK2    | PAK2        | STE      | STE20     | PAKA      | Hs              | MGC        | 7262289      | 82235                                       | 15517                                               |                                                                 | Cleavage                | 6          |
| STK3    | MST2        | STE      | STE20     | MST       | Hs              | MGC        | 3868822      | 2660                                        | 549                                                 |                                                                 | Cleavage                | 7          |
| BMPR1B  | BMPR1B      | TKL      | STKR      | Type1     | Hs              | MGC        | 6202951      | 37084                                       | 8345                                                |                                                                 | Cleavage                | This study |
| DCLK1   | DCAMKL1     | CAMK     | DCAMKL    |           | Hs              | EU         | NM_004734    | 3185                                        | 929                                                 |                                                                 | Cleavage                | 8          |
| NUAK2   | Nuak2       | CAMK     | CAMKL     | Nuak      | Hs              | MGC        | 5088037      | 3589                                        | 1239                                                |                                                                 | Cleavage                | This study |
| Irak2   | IRAK2       | TKL      | IRAK      |           | Mm              | FANTOM     | 4732448K15   | 56185                                       | 20365                                               |                                                                 | Cleavage                | This study |
| Map2k6  | MAP2K6      | STE      | STE7      |           | Mm              | FANTOM     | 5730544D20   | 39328                                       | 14303                                               |                                                                 | Cleavage                | This study |
| RIOK3   | RIOK3       | Atypical | RIO       | RIO3      | Hs              | MGC        | 5745005      | 51903                                       | 19743                                               |                                                                 | Cleavage                | This study |
| PCTK1   | PCTAIRE1    | CMGC     | CDK       | TAIRE     | Hs              | MGC        | 4762081      | 22643                                       | 8984                                                |                                                                 | Cleavage                | This study |
| Csk     | CSK         | TK       | Csk       |           | Mm              | FANTOM     | F830006C15   | 47585                                       | 19863                                               |                                                                 | Cleavage                | This study |
| DYRK3   | DYRK3       | CMGC     | DYRK      | Dyrk2     | Hs              | MGC        | 3913541      | 36585                                       | 17233                                               |                                                                 | Cleavage                | This study |
| PRKCI   | PKCi        | AGC      | PKC       | Iota      | Hs              | MGC        | 4823853      | 31071                                       | 16443                                               |                                                                 | Cleavage                | This study |
| RIOK1   | RIOK1       | Atypical | RIO       | RIO1      | Hs              | MGC        | 3537086      | 64640                                       | 38059                                               |                                                                 | Cleavage                | This study |
| PIM2    | PIM2        | CAMK     | PIM       |           | Hs              | MGC        | 3913552      | 8660                                        | 5505                                                |                                                                 | Cleavage                | This study |
| DCLK2   | DCAMKL2     | CAMK     | DCAMKL    |           | Hs              | MGC        | 5532881      | 6632                                        | 4308                                                |                                                                 | Cleavage                | This study |
| CAMKK1  | CaMKK1      | Other    | CAMKK     | Meta      | Hs              | MGC        | 5175128      | 125241                                      | 84039                                               |                                                                 | Cleavage                | This study |
| PDPK1   | PDK1        | AGC      | PKB       |           | Hs              | MGC        | 4561371      | 32915                                       | 22391                                               |                                                                 | Cleavage                | This study |
| Csnk1g1 | CK1g1       | CK1      | CK1       |           | Mm              | FANTOM     | G630030E07   | 40328                                       | 27528                                               |                                                                 | Cleavage                | This study |
| PTK2    | FAK         | TK       | Fak       |           | Hs              | MGC        | 4999680      | 11452                                       | 7944                                                |                                                                 | Cleavage                | 9          |
| Akt2    | AKT2        | AGC      | AKT       |           | Mm              | FANTOM     | K430312O07   | 22952                                       | 16104                                               |                                                                 | Cleavage                | This study |
| RIPK3   | RIPK3       | TKL      | RIPK      |           | Hs              | MGC        | 5213027      | 31515                                       | 22221                                               |                                                                 | Cleavage                | 10         |
| RPS6KB1 | p70S6K      | AGC      | RSK       | p70       | Hs              | MGC        | 6142009      | 43468                                       | 30852                                               |                                                                 | Cleavage                | 11         |
| MASTL   | MASTL       | AGC      | MAST      |           | Hs              | MGC        | 3449913      | 504                                         | 359                                                 |                                                                 | Cleavage                | This study |
| PRKCQ   | PKCt        | AGC      | PKC       | Delta     | Hs              | MGC        | 8322411      | 6920                                        | 4929                                                |                                                                 | Cleavage                | 12         |
| TWF1    | A6          | Atypical | A6        |           | Hs              | MGC        | 5297068      | 35848                                       | 25568                                               |                                                                 | Cleavage                | This study |
| TGFB1   | TGFB1       | TKL      | STKR      | Type1     | Hs              | MGC        | 30344890     | 29737                                       | 21248                                               |                                                                 | Cleavage                | This study |
| RPS6KA5 | MSK1        | AGC      | RSK       | MSK       | Hs              | MGC        | 3139114      | 48792                                       | 35100                                               |                                                                 | Cleavage                | This study |
| BMX     | BMX         | TK       | Tec       |           | Hs              | MGC        | 3919253      | 25742                                       | 18878                                               |                                                                 | Cleavage                | 13         |
| ACVR1   | ALK2        | TKL      | STKR      | Type1     | Hs              | MGC        | 5209711      | 48228                                       | 35712                                               |                                                                 | Cleavage                | This study |
| TRIB3   | Trb3        | CAMK     | Trbl      |           | Hs              | MGC        | 5104452      | 29934                                       | 22175                                               |                                                                 | Cleavage                | This study |
| PRKAA1  | AMPKA1      | CAMK     | CAMKL     | AMPK      | Hs              | MGC        | 4839033      | 34292                                       | 25496                                               |                                                                 | Cleavage                | This study |
| MAPK12  | p38g        | CMGC     | MAPK      | p38       | Hs              | MGC        | 4907996      | 41008                                       | 31378                                               |                                                                 | Cleavage                | This study |
| ULK4    | ULK4        | Other    | ULK       |           | Hs              | MGC        | 4343362      | 53836                                       | 41640                                               |                                                                 | Cleavage                | This study |
| HSPB8   | H11         | Atypical | H11       |           | Hs              | MGC        | 3607117      | 82200                                       | 64444                                               |                                                                 | Cleavage                | This study |
| EEF2K   | eEF2K       | Atypical | Alpha     | eEF2K     | Hs              | MGC        | 5553055      | 49312                                       | 38676                                               |                                                                 | Cleavage                | This study |
| PCTK2   | PCTAIRE2    | CMGC     | CDK       | TAIRE     | Hs              | MGC        | 4824359      | 12144                                       | 9591                                                |                                                                 | No Cleavage             |            |
| CDK8    | CDK8        | CMGC     | CDK       | CDK8      | Hs              | MGC        | 40032854     | 4857                                        | 3837                                                |                                                                 | No Cleavage             |            |
| HCK     | HCK         | TK       | Src       |           | Hs              | MGC        | 40025497     | 63064                                       | 50069                                               |                                                                 | No Cleavage             |            |
| Epha4   | Epha4       | TK       | Eph       |           | Mm              | FANTOM     | 4632410M06   | 527                                         | 419                                                 |                                                                 | No Cleavage             |            |
| CDK15   | PFTAIRE2    | CMGC     | CDK       | TAIRE     | Hs              | MGC        | 5200755      | 16849                                       | 13409                                               |                                                                 | No Cleavage             |            |
| CHEK1   | CHK1        | CAMK     | CAMKL     | CHK1      | Hs              | MGC        | 4091997      | 5479                                        | 4367                                                |                                                                 | No Cleavage             |            |
| RPS6KA4 | MSK2        | AGC      | RSK       | MSK       | Hs              | MGC        | 5763859      | 70420                                       | 56204                                               |                                                                 | ND                      |            |
| Met     | MET         | TK       | Met       |           | Mm              | FANTOM     | G370067N04   | 2016                                        | 1612                                                |                                                                 | No Cleavage             |            |
| ACVR1C  | ALK7        | TKL      | STKR      | Type1     | Hs              | MGC        | 4801219      | 23392                                       | 18763                                               |                                                                 | No Cleavage             |            |
| CAMKK2  | CaMKK2      | Other    | CAMKK     | Meta      | Hs              | MGC        | 3842706      | 83971                                       | 67393                                               |                                                                 | No Cleavage             |            |
| ALK     | ALK         | TK       | Alk       |           | Hs              | EU         | NM_004304    | 12514                                       | 10069                                               |                                                                 | ND                      |            |
| RAGE1   | MOK         | CMGC     | RCK       |           | Hs              | EU         | NM_014226    | 574                                         | 463                                                 |                                                                 | No Cleavage             |            |
| CDK3    | CDK3        | CMGC     | CDK       | CDC2      | Hs              | EU         | NM_001258    | 7244                                        | 5888                                                |                                                                 | No Cleavage             |            |
| NEK11   | NEK11       | Other    | NEK       |           | Hs              | MGC        | 4829802      | 41827                                       | 34351                                               |                                                                 | No Cleavage             |            |
| MAP3K2  | MAP3K2      | STE      | STE11     |           | Hs              | EU         | NM_006609    | 7913                                        | 6504                                                |                                                                 | ND                      |            |
| PRKD3   | PKD3        | CAMK     | PKD       |           | Hs              | MGC        | 5266769      | 9689                                        | 7973                                                |                                                                 | No Cleavage             |            |
| CSNK1D  | CK1d        | CK1      | CK1       |           | Hs              | MGC        | 3546633      | 7840                                        | 6460                                                |                                                                 | No Cleavage             |            |
| PTK2B   | PYK2        | TK       | Fak       |           | Hs              | MGC        | 4343040      | 1680                                        | 1385                                                |                                                                 | ND                      |            |
| ARAF    | ARAF        | TKL      | RAF       |           | Hs              | MGC        | 2966604      | 20607                                       | 17073                                               |                                                                 | ND                      |            |
| Ank1    | Sgk288      | TKL      | RIPK      |           | Mm              | FANTOM     | 9930020N01   | 4806                                        | 3987                                                |                                                                 | ND                      |            |
| SIK1    | SIK         | CAMK     | CAMKL     | QIK       | Hs              | MGC        | 4831049      | 12716                                       | 10567                                               |                                                                 | ND                      |            |
| JAK1    | JAK1        | TK       | JakA      |           | Hs              | MGC        | 40146751     | 564                                         | 472                                                 |                                                                 | No Cleavage             |            |
| MAP3K7  | MAP3K7      | STE      | STE11     |           | Hs              | MGC        | 3906837      | 70576                                       | 59180                                               |                                                                 | ND                      |            |
| CDK9    | CDK9        | CMGC     | CDK       | CDK9      | Hs              | MGC        | 3460767      | 23071                                       | 19457                                               |                                                                 | No Cleavage             |            |
| STYK1   | SURTK106    | TK       | TK-Unique |           | Hs              | MGC        | 7939669      | 22671                                       | 19151                                               |                                                                 | No Cleavage             |            |
| CHEK2   | CHK2        | CAMK     | RAD53     |           | Hs              | MGC        | 3532866      | 77236                                       | 65439                                               |                                                                 | No Cleavage             |            |
| CLK3    | CLK3        | CMGC     | CLK       |           | Hs              | MGC        | 3138580      | 1817                                        | 1540                                                |                                                                 | No Cleavage             |            |
| RAF1    | RAF1        | TKL      | RAF       |           | Hs              | MGC        | 3904404      | 20615                                       | 17483                                               |                                                                 | No Cleavage             |            |
| NLK     | NLK         | CMGC     | MAPK      | nmo       | Hs              | MGC        | 6527673      | 30657                                       | 26129                                               |                                                                 | No Cleavage             |            |
| CDKL1   | CDKL1       | CMGC     | CDKL      |           | Hs              | MGC        | 8143980      | 6724                                        | 5744                                                |                                                                 | No Cleavage             |            |
| Brd4    | BRD4        | Atypical | BRD       |           | Mm              | FANTOM     | M5C1072G19   | 39163                                       | 33472                                               |                                                                 | ND                      |            |
| CDK20   | CCRK        | CMGC     | CDK       |           | Hs              | MGC        | 3605918      | 2216                                        | 1896                                                |                                                                 | No Cleavage             |            |
| Stk19   | G11         | Atypical | G11       |           | Mm              | FANTOM     | I920061M10   | 12388                                       | 10615                                               |                                                                 | No Cleavage             |            |
| PAK1    | PAK1        | STE      | STE20     | PAKA      | Hs              | MGC        | 40034484     | 1964                                        | 1690                                                |                                                                 | No Cleavage             |            |
| DAPK3   | DAPK3       | CAMK     | DAPK      |           | Hs              | MGC        | 8992146      | 8953                                        | 7712                                                |                                                                 | No Cleavage             |            |
| VRK2    | VRK2        | CK1      | VRK       |           | Hs              | MGC        | 5221315      | 1624                                        | 1400                                                |                                                                 | No Cleavage             |            |
| BCKDK   | BCKDK       | Atypical | PDHK      |           | Hs              | MGC        | 3630050      | 1828                                        | 1577                                                |                                                                 | ND                      |            |
| STK32B  | YANK2       | AGC      | YANK      |           | Hs              | MGC        | 5744969      | 17704                                       | 15277                                               |                                                                 | ND                      |            |
| MAK     | MAK         | CMGC     | RCK       |           | Hs              | MGC        | 5167621      | 6012                                        | 5192                                                |                                                                 | No Cleavage             |            |
| CABC1   | ADCK3       | Atypical | ABC1      | ABC1-A    | Hs              | MGC        | 3604948      | 16129                                       | 13944                                               |                                                                 | ND                      |            |
| IRAK4   | IRAK4       | TKL      | IRAK      |           | Hs              | MGC        | 4287014      | 73301                                       | 63481                                               |                                                                 | ND                      |            |
| Mos     | MOS         | Other    | MOS       |           | Mm              | FANTOM     | 4930571D16   | 3048                                        | 2644                                                |                                                                 | No Cleavage             |            |
| AURKB   | AurB        | Other    | AUR       |           | Hs              | MGC        | 3677349      | 16953                                       | 14709                                               |                                                                 | ND                      |            |
| ZAK     | ZAK         | TKL      | MLK       | MLK       | Hs              | EU         | NM_016653    | 14166                                       | 12307                                               |                                                                 | No Cleavage             |            |
| SGK1    | SGK         | AGC      | SGK       |           | Hs              | MGC        | 3459056      | 31539                                       | 27451                                               |                                                                 | ND                      |            |
| RPS6KA3 | RSK2        | AGC      | RSK       | RSK       | Hs              | MGC        | 40007452     | 2365                                        | 2064                                                |                                                                 | No Cleavage             |            |
| MARK3   | MARK3       | CAMK     | CAMKL     | MARK      | Hs              | EU         | NM_001128920 | 40319                                       | 35305                                               |                                                                 | ND                      |            |

|             |          |          |              |        |        |              |              |        |        |             |             |
|-------------|----------|----------|--------------|--------|--------|--------------|--------------|--------|--------|-------------|-------------|
| PLK2        | PLK2     | Other    | PLK          | Hs     | MGC    | 3831747      | 12684        | 11108  | 88     | No Cleavage |             |
| RIPK2       | RIPK2    | TKL      | RIPK         | Hs     | MGC    | 4026156      | 54556        | 47816  | 88     | No Cleavage |             |
| CAMK1G      | CaMK1g   | CAMK     | CAMK1        | Hs     | MGC    | 5179957      | 27717        | 24329  | 88     | ND          |             |
| CAMK2G      | CaMK2g   | CAMK     | CAMK2        | Hs     | MGC    | 4813948      | 959          | 844    | 88     | No Cleavage |             |
| Ripk5       | Sgk496   | Other    | Other-Unique | Mm     | FANTOM | C820013G01   | 29633        | 26100  | 88     | ND          |             |
| CDC7        | CDC7     | Other    | CDC7         | Hs     | MGC    | 40034179     | 55002        | 48492  | 88     | ND          |             |
| HIPK1       | HIPK1    | CMGC     | DYRK         | HIPK   | MGC    | 4830408      | 14565        | 12883  | 88     | ND          |             |
| TSSK3       | TSSK3    | CAMK     | TSSK         | Hs     | MGC    | 5171736      | 78480        | 69432  | 88     | ND          |             |
| SYK         | SYK      | TK       | Syk          | Hs     | MGC    | 3542895      | 12363        | 10951  | 89     | ND          |             |
| TBK1        | TBK1     | Other    | IKK          | Hs     | MGC    | 4824988      | 44984        | 39892  | 89     | No Cleavage |             |
| BMP2K       | BIKE     | Other    | NAK          | Hs     | MGC    | 5272264      | 55160        | 49004  | 89     | ND          |             |
| ADRBK2      | BARK2    | AGC      | GRK          | BARK   | MGC    | 5590378      | 4817         | 4281   | 89     | No Cleavage |             |
| Plk7        | CCK4     | TK       | CCK4         | Mm     | FANTOM | D930032O19   | 2112         | 1880   | 89     | ND          |             |
| GSK3A       | GSK3A    | CMGC     | GSK          | Hs     | MGC    | 6171438      | 26115        | 23273  | 89     | ND          |             |
| DYRK1A      | DYRK1A   | CMGC     | DYRK         | Dyrk1  | EU     | NM_130436    | 19043        | 16975  | 89     | ND          |             |
| Ikkbb       | IKKb     | Other    | IKK          | Mm     | FANTOM | I830125F20   | 45180        | 40324  | 89     | ND          |             |
| IRAK1       | IRAK1    | TKL      | IRAK         | Hs     | MGC    | 6164719      | 6612         | 5903   | 89     | ND          |             |
| RnaseL      | RNaseL   | Other    | Other-Unique | Mm     | FANTOM | C130033H22   | 1033         | 923    | 89     | No Cleavage |             |
| CDK13       | CHED     | CMGC     | CDK          | CRK7   | EU     | NM_003718    | 631          | 564    | 89     | ND          |             |
| MYLK2       | skMLCK   | CAMK     | MLCK         | Hs     | MGC    | 40085085     | 47753        | 42765  | 90     | ND          |             |
| TGFBR2      | TGFBR2   | TKL      | STKR         | Type2  | EU     | NM_003242    | 57417        | 51420  | 90     | ND          |             |
| MAP4K3      | KHS2     | STE      | STE20        | KHS    | MGC    | 5296205      | 9481         | 8509   | 90     | ND          |             |
| NEK2        | NEK2     | Other    | NEK          | Hs     | MGC    | 5541026      | 6002         | 5392   | 90     | ND          |             |
| BB049667    | NEK5     | Other    | NEK          | Mm     | FANTOM | 6530411J22   | 47571        | 42795  | 90     | ND          |             |
| STK16       | MPSK1    | Other    | NAK          | Hs     | MGC    | 5760866      | 11070        | 9964   | 90     | ND          |             |
| NEK4        | NEK4     | Other    | NEK          | Hs     | MGC    | 5169184      | 21652        | 19541  | 90     | ND          |             |
| PDGFRA      | PDGFRa   | TK       | PDGFR        | Hs     | MGC    | 5205969      | 61054        | 55141  | 90     | ND          |             |
| Sgk3        | SGK3     | AGC      | SGK          | Mm     | FANTOM | 5031426D23   | 9541         | 8655   | 91     | ND          |             |
| MELK        | MELK     | CAMK     | CAMKL        | MELK   | Hs     | MGC          | 4547136      | 1049   | 952    | 91          | ND          |
| GRK5        | GPRK5    | AGC      | GRK          | GRK    | Hs     | MGC          | 6482467      | 25921  | 23581  | 91          | ND          |
| Frk         | FRK      | TK       | Src          | Mm     | FANTOM | 4732463C23   | 43003        | 39132  | 91     | ND          |             |
| STK25       | YSK1     | STE      | STE20        | YSK    | MGC    | 4867978      | 1129         | 1028   | 91     | ND          |             |
| PDK2        | PDHK2    | Atypical | PDHK         | Hs     | MGC    | 4272593      | 42317        | 38635  | 91     | ND          |             |
| PDK3        | PDHK3    | Atypical | PDHK         | Hs     | MGC    | 3922929      | 6536         | 5976   | 91     | ND          |             |
| PRKCA       | PKCa     | AGC      | PKC          | Alpha  | Hs     | MGC          | 40028305     | 15307  | 13999  | 91          | ND          |
| PCTK3       | PCTAIRE3 | CMGC     | CDK          | TAIRE  | Hs     | MGC          | 3855304      | 52050  | 47624  | 91          | ND          |
| STK17A      | DRAK1    | CAMK     | DAPK         | Hs     | MGC    | 5761182      | 1300         | 1191   | 92     | ND          |             |
| TSSK6       | SSTK     | CAMK     | TSSK         | Hs     | MGC    | 4826305      | 31343        | 28786  | 92     | No Cleavage |             |
| AURK6       | AurA     | Other    | AUR          | Hs     | MGC    | 3456017      | 39611        | 36405  | 92     | ND          |             |
| AURKC       | AurC     | Other    | AUR          | Hs     | EU     | NM_001015878 | 29879        | 27499  | 92     | ND          |             |
| TIE1        | TIE1     | TK       | Tie          | Hs     | MGC    | 5767075      | 732          | 674    | 92     | ND          |             |
| Stk35       | CLIK1    | Other    | NKF4         | Mm     | FANTOM | 1700054C12   | 44303        | 40832  | 92     | ND          |             |
| PHKG1       | PHKg1    | CAMK     | PHK          | Hs     | MGC    | 6277230      | 37843        | 34881  | 92     | ND          |             |
| A630047E20F | TBCK     | Other    | TBCK         | Mm     | FANTOM | 9430001M19   | 53196        | 49115  | 92     | ND          |             |
| ADCK4       | ADCK4    | Atypical | ABC1         | ABC1-A | Hs     | MGC          | 4342891      | 10003  | 9244   | 92          | No Cleavage |
| CSNK1E      | CK1e     | CK1      | CK1          | Hs     | MGC    | 3937782      | 21533        | 19925  | 93     | No Cleavage |             |
| RIOK2       | RIOK2    | Atypical | RIO          | RIO2   | Hs     | MGC          | 3449997      | 31607  | 29271  | 93          | ND          |
| IKBKE       | IKKe     | Other    | IKK          | Hs     | EU     | NM_014002    | 28933        | 26815  | 93     | ND          |             |
| FLT1        | FLT1     | TK       | VEGFR        | Hs     | MGC    | 5722772      | 3288         | 3048   | 93     | No Cleavage |             |
| DAPK2       | DAPK2    | CAMK     | DAPK         | Hs     | MGC    | 40005390     | 30752        | 28536  | 93     | ND          |             |
| ACVR1B      | ALK4     | TKL      | STKR         | Type1  | Hs     | MGC          | 3352720      | 35056  | 32532  | 93          | ND          |
| CSNK1G2     | CK1g2    | CK1      | CK1          | Hs     | MGC    | 3851613      | 52992        | 49197  | 93     | ND          |             |
| ADCK1       | ADCK1    | Atypical | ABC1         | ABC1-B | Hs     | MGC          | 6150933      | 8189   | 7611   | 93          | No Cleavage |
| ACVR2A      | ACTR2    | TKL      | STKR         | Type2  | EU     | NM_001616    | 41813        | 38895  | 93     | ND          |             |
| Eif2ak4     | GCN2     | Other    | PEK          | GCN2   | Mm     | FANTOM       | 4933428O03   | 82341  | 76641  | 93          | ND          |
| YES1        | YES      | TK       | Src          | Hs     | MGC    | 5260751      | 32107        | 29914  | 93     | ND          |             |
| Rps6ka6     | RSK4     | AGC      | RSK          | RSK    | Mm     | FANTOM       | C330026J02   | 885    | 825    | 93          | ND          |
| MAP3K8      | COT      | STE      | STE-Unique   | Hs     | MGC    | 8322618      | 53779        | 50151  | 93     | ND          |             |
| KIT         | KIT      | TK       | PDGFR        | Hs     | MGC    | 4375615      | 31633        | 29501  | 93     | ND          |             |
| PDK1        | PDHK1    | Atypical | PDHK         | Hs     | MGC    | 4778360      | 30865        | 28791  | 93     | ND          |             |
| PAK3        | PAK3     | STE      | STE20        | PAKA   | Hs     | EU           | NM_001128166 | 124345 | 116509 | 94          | ND          |
| TP53RK      | PRPK     | Other    | Bud32        | Hs     | MGC    | 5277911      | 21075        | 19752  | 94     | ND          |             |
| CLK2        | CLK2     | CMGC     | CLK          | Hs     | MGC    | 6007375      | 65465        | 61431  | 94     | ND          |             |
| TTK         | TTK      | Other    | TTK          | Hs     | MGC    | 5270012      | 32912        | 30921  | 94     | ND          |             |
| Fgfr3       | FGFR3    | TK       | FGFR         | Mm     | FANTOM | F420011N06   | 83069        | 78064  | 94     | ND          |             |
| CSNK2A2     | CK2a2    | Other    | CK2          | Hs     | MGC    | 3951914      | 46855        | 43975  | 94     | No Cleavage |             |
| MAP2K5      | MAP2K5   | STE      | STE7         | Hs     | MGC    | 4100679      | 47524        | 44679  | 94     | ND          |             |
| CASK        | CASK     | CAMK     | CASK         | Hs     | MGC    | 40125862     | 76091        | 71671  | 94     | ND          |             |
| CAMK1D      | CaMK1d   | CAMK     | CAMK1        | Hs     | MGC    | 5748490      | 101236       | 95453  | 94     | ND          |             |
| Nek8        | NEK8     | Other    | NEK          | Mm     | FANTOM | F630023G20   | 26704        | 25233  | 94     | ND          |             |
| UHMK1       | KIS      | Other    | Other-Unique | Hs     | MGC    | 4649261      | 60509        | 57191  | 95     | ND          |             |
| SNRK        | SNRK     | CAMK     | CAMKL        | SNRK   | Hs     | MGC          | 4375623      | 33593  | 31805  | 95          | No Cleavage |
| MAP2K3      | MAP2K3   | STE      | STE7         | Hs     | MGC    | 5215093      | 41180        | 39039  | 95     | ND          |             |
| CAMK2A      | CaMK2a   | CAMK     | CAMK2        | Hs     | EU     | NM_171825    | 32819        | 31175  | 95     | ND          |             |
| TESK2       | TESK2    | TKL      | LISK         | TESK   | Hs     | MGC          | 5425494      | 15704  | 14920  | 95          | ND          |
| TLK1        | TLK1     | Other    | TLK          | Hs     | MGC    | 5532877      | 91152        | 86763  | 95     | ND          |             |
| BMPR1A      | BMPR1A   | TKL      | STKR         | Type1  | Hs     | MGC          | 4824378      | 40644  | 38693  | 95          | ND          |
| Myo3a       | MYO3A    | STE      | STE20        | NinaC  | Mm     | FANTOM       | 9030416P08   | 47423  | 45167  | 95          | ND          |
| Nek7        | NEK7     | Other    | NEK          | Mm     | FANTOM | 9530057D01   | 45984        | 43811  | 95     | ND          |             |
| TAOK2       | TAO2     | STE      | STE20        | TAO    | Hs     | EU           | NM_004783    | 10419  | 9928   | 95          | ND          |
| ACVRL1      | ALK1     | TKL      | STKR         | Type1  | Hs     | MGC          | 5179243      | 30429  | 29008  | 95          | ND          |
| Irak3       | IRAK3    | TKL      | IRAK         | Mm     | FANTOM | C330013G03   | 87033        | 83119  | 96     | ND          |             |
| CSNK1A1L    | CK1a2    | CK1      | CK1          | Hs     | MGC    | 5266487      | 20139        | 19239  | 96     | ND          |             |
| STK38       | NDR1     | AGC      | NDR          | Hs     | MGC    | 4554884      | 31196        | 29829  | 96     | ND          |             |
| Csf1r       | FMS      | TK       | PDGFR        | Mm     | FANTOM | 1300008N20   | 7133         | 6821   | 96     | ND          |             |
| CDK10       | CDK10    | CMGC     | CDK          | CDK10  | Hs     | MGC          | 4865641      | 48323  | 46215  | 96          | ND          |
| PRKACB      | PKACb    | AGC      | PKA          | Hs     | MGC    | 5262372      | 36180        | 34607  | 96     | ND          |             |
| Prkg2       | PKG2     | AGC      | PKG          | Mm     | FANTOM | A230058O08   | 18412        | 17639  | 96     | ND          |             |
| Clk4        | CLK4     | CMGC     | CLK          | Mm     | FANTOM | 3110002D09   | 12321        | 11820  | 96     | ND          |             |
| STK40       | Sgk495   | CAMK     | CAMK-Unique  | Hs     | MGC    | 4109652      | 34511        | 33124  | 96     | ND          |             |
| ABL2        | ARG      | TK       | Abi          | Hs     | MGC    | 5173213      | 131756       | 126520 | 96     | ND          |             |
| MAP4K5      | KHS1     | STE      | STE20        | KHS    | Hs     | MGC          | 5272190      | 9299   | 8929   | 96          | ND          |
| CDKL5       | CDKL5    | CMGC     | CDKL         | Hs     | MGC    | 5295038      | 5359         | 5148   | 96     | ND          |             |
| Tec         | TEC      | TK       | Tec          | Mm     | FANTOM | F630035P04   | 513          | 493    | 96     | No Cleavage |             |
| Epha5       | Epha5    | TK       | Eph          | Mm     | FANTOM | E530015D21   | 844          | 812    | 96     | ND          |             |
| Aatk        | LMR1     | TK       | Lmr          | Mm     | FANTOM | 9830165D16   | 109933       | 105765 | 96     | ND          |             |
| PASK        | PASK     | CAMK     | CAMKL        | PASK   | Hs     | MGC          | 4419998      | 38308  | 36856  | 96          | ND          |

|             |            |          |              |         |        |            |            |        |       |             |             |
|-------------|------------|----------|--------------|---------|--------|------------|------------|--------|-------|-------------|-------------|
| Gak         | GAK        | Other    | NAK          | Mm      | FANTOM | I920043D18 | 8839       | 8504   | 96    | ND          |             |
| FGFR2       | FGFR2      | TK       | FGFR         | Hs      | MGC    | 5277896    | 38593      | 37137  | 96    | ND          |             |
| Plk6        | BRK        | TK       | Src          | Mm      | FANTOM | F630104G13 | 20500      | 19733  | 96    | ND          |             |
| NTRK2       | TRKB       | TK       | Trk          | Hs      | MGC    | 4941763    | 11880      | 11444  | 96    | ND          |             |
| MAPK1       | Erk2       | CMGC     | MAPK         | ERK     | Hs     | MGC        | 4685557    | 57205  | 55120 | 96          | ND          |
| FGR         | FGR        | TK       | Src          | Hs      | MGC    | 5734966    | 14912      | 14376  | 96    | ND          |             |
| SPEG        | SPEG       | CAMK     | Trio         | Hs      | MGC    | 4100987    | 99673      | 96148  | 96    | ND          |             |
| PKMYT1      | MYT1       | Other    | WEE          | Hs      | EU     | NM_004203  | 33871      | 32735  | 97    | ND          |             |
| PAK4        | PAK4       | STE      | STE20        | PAKB    | Hs     | MGC        | 5421365    | 3776   | 3653  | 97          | ND          |
| Epha3       | Epha3      | TK       | Eph          | Mm      | FANTOM | B130048J04 | 75829      | 73516  | 97    | ND          |             |
| DYRK1B      | DYRK1B     | CMGC     | DYRK         | Dyrk1   | Hs     | MGC        | 5019417    | 83999  | 81471 | 97          | ND          |
| MAPKAPK5    | MAPKAPK5   | CAMK     | MAPK         | MAPKAPK | Hs     | MGC        | 4997201    | 63822  | 61961 | 97          | ND          |
| CSNK1G3     | CK1g3      | CK1      | CK1          | Hs      | MGC    | 4817058    | 60579      | 58833  | 97    | ND          |             |
| TRIB2       | Trb2       | CAMK     | Trbl         | Hs      | MGC    | 3607549    | 72365      | 70327  | 97    | ND          |             |
| ULK3        | ULK3       | Other    | ULK          | Hs      | MGC    | 5219403    | 19669      | 19147  | 97    | No Cleavage |             |
| PDGFRB      | PDGFRb     | TK       | PDGFR        | Hs      | MGC    | 5309813    | 49328      | 48057  | 97    | ND          |             |
| MAPK14      | p38a       | CMGC     | MAPK         | p38     | Hs     | MGC        | 5181064    | 82804  | 80682 | 97          | ND          |
| CAMK2D      | CaMK2d     | CAMK     | CAMK2        | Hs      | MGC    | 5178265    | 98888      | 96416  | 98    | ND          |             |
| Myk         | smMLCK     | CAMK     | MLCK         | Mm      | FANTOM | 6820449L08 | 57453      | 56073  | 98    | ND          |             |
| MAPKAPK2    | MAPKAPK2   | CAMK     | MAPKAPK      | MAPKAPK | Hs     | MGC        | 6267183    | 1578   | 1548  | 98          | ND          |
| CDK7        | CDK7       | CMGC     | CDK          | CDK7    | Hs     | MGC        | 3997991    | 37165  | 36477 | 98          | ND          |
| PNCK        | CaMK1b     | CAMK     | CAMK1        | Hs      | MGC    | 5751849    | 36464      | 35821  | 98    | ND          |             |
| Epha7       | Epha7      | TK       | Eph          | Mm      | FANTOM | 5330417H08 | 60065      | 59025  | 98    | ND          |             |
| FGFR1       | FGFR1      | TK       | FGFR         | Hs      | MGC    | 30387634   | 27608      | 27140  | 98    | ND          |             |
| Flt3        | FLT3       | TK       | PDGFR        | Mm      | FANTOM | A930013I19 | 77852      | 76560  | 98    | ND          |             |
| Gucy2e      | CYGD       | RGC      | RGC          | Mm      | FANTOM | A930005H11 | 2108       | 2075   | 98    | ND          |             |
| CSNK2A1     | CK2a1      | Other    | CK2          | Hs      | MGC    | 5772615    | 30272      | 29815  | 98    | ND          |             |
| CAMK2B      | CaMK2b     | CAMK     | CAMK2        | Hs      | MGC    | 5014712    | 47815      | 47176  | 99    | ND          |             |
| STK33       | STK33      | CAMK     | CAMK-Unique  | Hs      | MGC    | 5296502    | 32941      | 32544  | 99    | ND          |             |
| PRKACG      | PKACg      | AGC      | PKA          | Hs      | MGC    | 5165721    | 31859      | 31521  | 99    | ND          |             |
| MAP2K2      | MAP2K2     | STE      | STE7         | Hs      | MGC    | 4025987    | 39678      | 39318  | 99    | ND          |             |
| SCYL2       | SCYL2      | Other    | SCY1         | Hs      | MGC    | 6473586    | 76836      | 76176  | 99    | ND          |             |
| OGG1        | CaMK1a     | CAMK     | CAMK1        | Hs      | MGC    | 3350168    | 55458      | 55008  | 99    | ND          |             |
| MAP2K1      | MAP2K1     | STE      | STE7         | Hs      | MGC    | 40053655   | 74976      | 74580  | 99    | ND          |             |
| Lrrk2       | LRRK2      | TKL      | LRRK         | Mm      | FANTOM | 4921513O20 | 47543      | 47391  | 100   | ND          |             |
| ERBB4       | HER4/ErbB4 | TK       | EGFR         | Hs      | MGC    | 8327667    | 15636      | 15681  | 100   | ND          |             |
| MAP4K2      | GCK        | STE      | STE20        | KHS     | Hs     | MGC        | 5530523    | 3476   | 3496  | 101         | ND          |
| MAPK10      | JNK3       | CMGC     | MAPK         | JNK     | Hs     | MGC        | 4838495    | 26117  | 26292 | 101         | ND          |
| IGF1R       | IGF1R      | TK       | InsR         | Hs      | MGC    | 8322664    | 6804       | 6852   | 101   | ND          |             |
| TAF10       | ILK        | TKL      | MLK          | ILK     | Hs     | MGC        | 4562773    | 22127  | 22287 | 101         | ND          |
| DYRK2       | DYRK2      | CMGC     | DYRK         | Dyrk2   | Hs     | MGC        | 4139392    | 48011  | 48433 | 101         | ND          |
| EIF2AK1     | HRI        | Other    | PEK          | Hs      | MGC    | 2989989    | 61351      | 62021  | 101   | ND          |             |
| TYRO3       | TYRO3      | TK       | Axl          | Hs      | MGC    | 6095596    | 10270      | 10400  | 101   | ND          |             |
| TWF2        | A6r        | Atypical | A6           | Hs      | MGC    | 2957960    | 91644      | 92907  | 101   | ND          |             |
| STK38L      | NDR2       | AGC      | NDR          | Hs      | MGC    | 4823429    | 46305      | 46988  | 101   | ND          |             |
| AXL         | AXL        | TK       | Axl          | Hs      | MGC    | 5205825    | 2040       | 2072   | 102   | ND          |             |
| MAPK11      | p38b       | CMGC     | MAPK         | p38     | Hs     | EU         | NM_002751  | 63331  | 64380 | 102         | ND          |
| EPHB3       | EphB3      | TK       | Eph          | Hs      | MGC    | 6472607    | 2324       | 2363   | 102   | ND          |             |
| Ick         | ICK        | CMGC     | RCK          | Mm      | FANTOM | E130304P20 | 2451       | 2492   | 102   | ND          |             |
| Ntrk1       | TRKA       | TK       | Trk          | Mm      | FANTOM | C130047N21 | 46909      | 47703  | 102   | ND          |             |
| MKNK1       | MNK1       | CAMK     | MAPKAPK      | MNK     | Hs     | MGC        | 3629765    | 82807  | 84284 | 102         | ND          |
| PDK4        | PDHK4      | Atypical | PDHK         | Hs      | EU     | NM_002612  | 39635      | 40363  | 102   | ND          |             |
| CDK5        | CDK5       | CMGC     | CDK          | CDK5    | Hs     | MGC        | 3537202    | 40781  | 41532 | 102         | ND          |
| EPHB6       | EphB6      | TK       | Eph          | Hs      | EU     | NM_004445  | 38292      | 39004  | 102   | ND          |             |
| PBK         | PBK        | Other    | TOPK         | Hs      | MGC    | 4082846    | 83549      | 85124  | 102   | ND          |             |
| FER         | FER        | TK       | Fer          | Hs      | EU     | NM_005246  | 8344       | 8502   | 102   | ND          |             |
| TRIM28      | TIF1b      | Atypical | TIF1         | Hs      | MGC    | 2906325    | 100289     | 102239 | 102   | ND          |             |
| 4930444A02R | Sgk196     | Other    | Other-Unique | Mm      | FANTOM | 4930444A02 | 34417      | 35099  | 102   | ND          |             |
| ZAP70       | ZAP70      | TK       | Syk          | Hs      | MGC    | 5757161    | 40345      | 41235  | 102   | ND          |             |
| ADRBK1      | BARK1      | AGC      | GRK          | BARK    | Hs     | MGC        | 5585846    | 843    | 861   | 102         | ND          |
| CDC2        | CDC2       | CMGC     | CDK          | CDC2    | Hs     | MGC        | 2967728    | 2902   | 2968  | 102         | No Cleavage |
| 2610019A05R | STLK5      | STE      | STE20        | STLK    | Mm     | FANTOM     | 2610019A05 | 58291  | 59768 | 103         | ND          |
| NEK6        | NEK6       | Other    | NEK          | Hs      | MGC    | 3507262    | 75819      | 77768  | 103   | ND          |             |
| TNK1        | TNK1       | TK       | Ack          | Hs      | MGC    | 5589312    | 36193      | 37149  | 103   | ND          |             |
| GSK3B       | GSK3B      | CMGC     | GSK          | Hs      | MGC    | 3357620    | 27915      | 28657  | 103   | ND          |             |
| Gucy2c      | HSER       | RGC      | RGC          | Mm      | FANTOM | 9130002N05 | 15784      | 16239  | 103   | ND          |             |
| JAK2        | JAK2       | TK       | JakA         | Hs      | MGC    | 5556026    | 6943       | 7147   | 103   | ND          |             |
| Frap1       | FRAP       | Atypical | PIKK         | FRAP    | Mm     | FANTOM     | F830216D04 | 10105  | 10409 | 103         | ND          |
| PRKCB       | PKCb       | AGC      | PKC          | Alpha   | Hs     | MGC        | 5260547    | 29741  | 30672 | 103         | ND          |
| PRKACA      | PKACa      | AGC      | PKA          | Hs      | MGC    | 6066764    | 41408      | 42740  | 103   | ND          |             |
| ACV2R2B     | ACTR2B     | TKL      | STKR         | Type2   | Hs     | MGC        | 40005760   | 34483  | 35604 | 103         | ND          |
| CDKL3       | CDKL3      | CMGC     | CDKL         | Hs      | MGC    | 5298279    | 3235       | 3341   | 103   | ND          |             |
| TSSK1B      | TSSK1      | CAMK     | TSSK         | Hs      | MGC    | 4816988    | 13997      | 14465  | 103   | ND          |             |
| PDIK1L      | CLIK1L     | Other    | NKF4         | Hs      | MGC    | 4828997    | 41427      | 42851  | 103   | ND          |             |
| TSSK2       | TSSK2      | CAMK     | TSSK         | Hs      | MGC    | 5273397    | 8988       | 9316   | 104   | ND          |             |
| BLK         | BLK        | TK       | Src          | Hs      | MGC    | 5216030    | 3433       | 3560   | 104   | ND          |             |
| VRK1        | VRK1       | CK1      | VRK          | Hs      | MGC    | 8322562    | 36672      | 38065  | 104   | ND          |             |
| NRBP1       | NRBP1      | Other    | NRBP         | Hs      | MGC    | 3534543    | 94607      | 98408  | 104   | ND          |             |
| SIK2        | QIK        | CAMK     | CAMKL        | QIK     | Hs     | EU         | NM_015191  | 46673  | 48569 | 104         | ND          |
| SGK2        | SGK2       | AGC      | SGK          | Hs      | MGC    | 5730271    | 40402      | 42044  | 104   | ND          |             |
| Alpk1       | AlphaK1    | Atypical | Alpha        | Mm      | FANTOM | B020030J01 | 4593       | 4803   | 105   | ND          |             |
| STK17B      | DRAK2      | CAMK     | DAPK         | Hs      | MGC    | 4575012    | 29120      | 30535  | 105   | ND          |             |
| PKN3        | PKN3       | AGC      | PKN          | Hs      | MGC    | 6649806    | 78000      | 82175  | 105   | ND          |             |
| PLK1        | PLK1       | Other    | PLK          | Hs      | MGC    | 3854860    | 46192      | 48740  | 106   | ND          |             |
| STK32C      | YANK3      | AGC      | YANK         | Hs      | MGC    | 4831007    | 38458      | 40702  | 106   | ND          |             |
| E530005C20F | Trad       | CAMK     | Trio         | Mm      | FANTOM | C130022K08 | 50423      | 53477  | 106   | ND          |             |
| NEK10       | NEK10      | Other    | NEK          | Hs      | MGC    | 4821808    | 50895      | 54036  | 106   | ND          |             |
| MLKL        | MLKL       | TKL      | TKL-Unique   | Hs      | MGC    | 5214733    | 32203      | 34233  | 106   | ND          |             |
| MAP3K11     | MLK3       | TKL      | MLK          | MLK     | Hs     | MGC        | 5733866    | 993    | 1060  | 107         | ND          |
| FES         | FES        | TK       | Fer          | Hs      | MGC    | 5170548    | 22859      | 24424  | 107   | ND          |             |
| MAPKAPK3    | MAPKAPK3   | CAMK     | MAPKAPK      | MAPKAPK | Hs     | MGC        | 3345889    | 40633  | 43609 | 107         | ND          |
| DDR1        | DDR1       | TK       | DDR          | Hs      | MGC    | 5262509    | 37316      | 40104  | 107   | ND          |             |
| CDK2        | CDK2       | CMGC     | CDK          | CDC2    | Hs     | MGC        | 3504348    | 71336  | 76775 | 108         | ND          |
| DDR2        | DDR2       | TK       | DDR          | Hs      | MGC    | 6162716    | 37281      | 40283  | 108   | ND          |             |
| E130304F04R | NIM1       | CAMK     | CAMKL        | NIM1    | Mm     | FANTOM     | C230008I02 | 2840   | 3072  | 108         | ND          |
| SCYL3       | SCYL3      | Other    | SCY1         | Hs      | MGC    | 4852719    | 45548      | 49280  | 108   | ND          |             |
| MAST1       | MAST1      | AGC      | MAST         | Hs      | MGC    | 4938605    | 9048       | 9807   | 108   | ND          |             |

|         |         |          |             |       |    |        |            |       |        |     |             |
|---------|---------|----------|-------------|-------|----|--------|------------|-------|--------|-----|-------------|
| DCLK3   | DCAMKL3 | CAMK     | DCAMKL      |       | Hs | EU     | NM_033403  | 607   | 660    | 109 | No Cleavage |
| RPS6KL1 | RSKL2   | AGC      | RSKL        |       | Hs | MGC    | 3945902    | 42608 | 46535  | 109 | ND          |
| MAP3K14 | NIK     | STE      | STE-Unique  |       | Hs | MGC    | 5497185    | 84087 | 92224  | 110 | ND          |
| OXR1    | OSR1    | STE      | STE20       | FRAY  | Hs | MGC    | 3163379    | 29487 | 32459  | 110 | ND          |
| NEK3    | NEK3    | Other    | NEK         |       | Hs | MGC    | 5000918    | 505   | 562    | 111 | ND          |
| STK11   | LKB1    | CAMK     | CAMKL       | LKB   | Hs | MGC    | 3946005    | 29044 | 32120  | 111 | ND          |
| RPS6KA1 | RSK3    | AGC      | RSK         | RSK   | Hs | MGC    | 4867373    | 66968 | 74118  | 111 | ND          |
| Trib1   | Trib1   | CAMK     | Trib1       |       | Mm | FANTOM | 4732420B02 | 64360 | 71311  | 111 | ND          |
| CDK6    | CDK6    | CMGC     | CDK         | CDK4  | Hs | MGC    | 6377987    | 52377 | 58188  | 111 | ND          |
| Map3k9  | MLK1    | TKL      | MLK         | MLK   | Mm | FANTOM | E130314H24 | 41215 | 45876  | 111 | ND          |
| Map3k3  | MAP3K3  | STE      | STE11       |       | Mm | FANTOM | 9430093B06 | 96209 | 107748 | 112 | ND          |
| CDK4    | CDK4    | CMGC     | CDK         | CDK4  | Hs | MGC    | 3531300    | 44562 | 50128  | 112 | ND          |
| InsR    | INSR    | TK       | InsR        |       | Mm | FANTOM | 4932439J01 | 2400  | 2716   | 113 | ND          |
| CAMKV   | VACAMKL | CAMK     | CAMK-Unique |       | Hs | MGC    | 2820734    | 15643 | 17925  | 115 | ND          |
| SRC     | SRC     | TK       | Src         |       | Hs | MGC    | 4548399    | 4395  | 5036   | 115 | ND          |
| PHKg2   | PHKg2   | CAMK     | PHK         |       | Hs | MGC    | 3138927    | 38650 | 44733  | 116 | ND          |
| Mst1r   | RON     | TK       | Met         |       | Mm | FANTOM | E130119A05 | 26415 | 31737  | 120 | ND          |
| MAP3K6  | MAP3K6  | STE      | STE11       |       | Hs | EU     | NM_004672  | 3322  | 4256   | 128 | ND          |
| DYRK4   | DYRK4   | CMGC     | DYRK        | Dyrk2 | Hs | MGC    | 5266287    | 20076 | 27884  | 129 | ND          |
| BRD3    | BRD3    | Atypical | BRD         |       | Hs | MGC    | 4856840    | 18073 | 23759  | 131 | ND          |

- Graves JD, Gotoh Y, Draves KE, Ambrose D, Han DK, Wright M *et al.* Caspase-mediated activation and induction of apoptosis by the mammalian Ste20-like kinase Mst1. *EMBO J* 1998; **17**: 2224-2234.
- Baek KH, Shin HJ, Jeong SJ, Park JW, McKeon F, Lee CW *et al.* Caspases-dependent cleavage of mitotic checkpoint proteins in response to microtubule inhibitor. *Oncol Res* 2005; **15**: 161-168.
- Takahashi M, Mukai H, Toshimori M, Miyamoto M, Ono Y. Proteolytic activation of PKN by caspase-3 or related protease during apoptosis. *Proc Natl Acad Sci U S A* 1998; **95**: 11566-11571.
- Tomiyoshi G, Horita Y, Nishita M, Ohashi K, Mizuno K. Caspase-mediated cleavage and activation of LIM-kinase 1 and its role in apoptotic membrane blebbing. *Genes Cells* 2004; **9**: 591-600.
- Coleman ML, Sahai EA, Yeo M, Bosch M, Dewar A, Olson MF. Membrane blebbing during apoptosis results from caspase-mediated activation of ROCK 1. *Nat Cell Biol* 2001; **3**: 339-345.
- Lee N, MacDonald H, Reinhard C, Halenbeck R, Roulston A, Shi T *et al.* Activation of hPAK65 by caspase cleavage induces some of the morphological and biochemical changes of apoptosis. *Proc Natl Acad Sci U S A* 1997; **94**: 13642-13647.
- Kakeya H, Onose R, Osada H. Caspase-mediated activation of a 36-kDa myelin basic protein kinase during anticancer drug-induced apoptosis. *Cancer Res* 1998; **58**: 4888-4894.
- Kruidering M, Schouten T, Evan GI, Vreugdenhil E. Caspase-mediated cleavage of the Ca<sup>2+</sup>/calmodulin-dependent protein kinase-like kinase facilitates neuronal apoptosis. *J Biol Chem* 2001; **276**: 38417-38425
- Crouch DH, Fincham VJ, Frame MC. Targeted proteolysis of the focal adhesion kinase pp125 FAK during c-MYC-induced apoptosis is suppressed by integrin signalling. *Oncogene* 1996; **12**: 2689-2696.
- Feng S, Yang Y, Mei Y, Ma L, Zhu DE, Hoti N *et al.* Cleavage of RIP3 inactivates its caspase-independent apoptosis pathway by removal of kinase domain. *Cell Signal* 2007; **19**: 2056-2067.
- Morley SJ, Jeffrey I, Bushell M, Pain VM, Clemens MJ. Differential requirements for caspase-8 activity in the mechanism of phosphorylation of eIF2alpha, cleavage of eIF4G1 and signaling events associated with the inhibition of protein synthesis in apoptotic Jurkat T cells. *FEBS Lett* 2000; **477**: 229-236.
- Emoto Y, Manome Y, Meinhardt G, Kasaki H, Kharbanda S, Robertson M *et al.* Proteolytic activation of protein kinase C delta by an ICE-like protease in apoptotic cells. *EMBO J* 1995; **14**: 6148-6156.
- Wu YM, Huang CL, Kung HJ, Huang CY. Proteolytic activation of ETK/Bmx tyrosine kinase by caspases. *J Biol Chem* 2001; **276**: 17672-17678.
