# Supplementary material for: Characterization of a caspase-3-substrate kinome using an N- and C-terminally tagged protein kinase library produced by a cell-free system
Source: PubMed Central journal article supplement — Cell Death Dis. 2010 Oct 28;1(10):e89–. doi: 10.1038/cddis.2010.65 (PMC3035903; doi:10.1038/cddis.2010.65), 2010-10-28
Supplement: cddis201065x2.pdf [file cddis201065x2.pdf]

**Supplementary Table S2.** Comparison of the cleavage sites between human and mouse PKs newly found in the study.

| Symbols | Kinome names | Groups   | Cleavage sequences <sup>a</sup> |                      |
|---------|--------------|----------|---------------------------------|----------------------|
|         |              |          | Human                           | Mouse                |
| ACVR1   | ALK2         | TKL      | I <u>A</u> SD(269)↓M            | I <u>A</u> SD(274)↓M |
| AKT2    | AKT2         | AGC      | D <u>P</u> MD(121)↓Y            | D <u>A</u> MD(121)↓Y |
| BMPR1B  | ALK6         | TKL      | CSTD(50)↓G                      | CSTD(50)↓G           |
|         |              |          | DFVD(120)↓G                     | DFVD(120)↓G          |
| CaMKK1  | CaMKK1       | Other    | EEAD(32)↓ <u>G</u>              | EEAD(32)↓ <u>E</u>   |
| CSK     | CSK          | TK       | DAPD(409)↓G                     | DAPD(409)↓G          |
| CSNK1G1 | CK1g1        | CK1      | VHVD(343)↓S                     | VHVD(343)↓S          |
| eEF2K   | eEF2K        | Atypical | EGVD(14)↓G                      | EGVD(14)↓G           |
|         |              |          | D <u>H</u> LD(430)↓N            | D <u>R</u> MD(429)↓N |
| HSPB8   | H11          | Atypical | MAD(3)↓G                        | MAD(3)↓G             |
| MAP2K6  | MAP2K6       | STE      | <u>E</u> FVD(289)↓F             | <u>D</u> FVD(289)↓F  |
| MAPK12  | p38g         | CMGC     | SAVD(46)↓ <u>G</u>              | SAVD(46)↓ <u>S</u>   |
| MARK1   | MARK1        | CAMK     | SATD(52)↓E                      | SATD(52)↓E           |
| MKNK2   | MNK2         | CAMK     | DQPD(32)↓H                      | —                    |
|         |              |          | D <u>I</u> PD(58)↓A             | D <u>I</u> PD(58)↓A  |
| PDPK1   | PDK1         | AGC      | S <u>H</u> PD(552)↓A            | S <u>N</u> PD(555)↓A |
| PIM2    | PIM2         | CAMK     | TDFD(198)↓G                     | TDFD(232)↓G          |
| PRKAA1  | AMPKa1       | CAMK     | TSLD(520)↓S                     | TSLD(505)↓S          |
| PRKCI   | aPKCi        | PKC      | TQRD(6)↓S                       | TQRD(6)↓S            |
| PRKX    | PRKX         | AGC      | ETPD(25)↓G                      | —                    |
| RIOK1   | RIOK1        | Atypical | EKDD(37)↓I                      | EKDD(37)↓I           |
| RIOK3   | RIOK3        | Atypical | DTRD(139)↓D                     | DTRD(139)↓D          |
| RPS6KA5 | MSK1         | AGC      | D <u>G</u> GD(20)↓G             | D <u>S</u> GD(19)↓G  |
|         |              |          | DELD(344)↓V                     | DELD(343)↓V          |
|         |              |          | TEMD(356)↓P                     | TEMD(355)↓P          |
| SNARK   | NuaK2        | CAMK     | VSED(546)↓S                     | VSED(553)↓S          |
| TRIB3   | TRB3         | CAMK     | VVPD(338)↓G                     | VVPD(338)↓G          |
| ULK4    | ULK4         | Other    | SQID(473)↓S                     | SQID(473)↓S          |

<sup>a</sup> Underlines show different amino acids.  
Numbers and "↓" mean the cleavage site.
